# Supplementary material for: Lactobacillus salivarius AP-32 and Lactobacillus reuteri GL-104 decrease glycemic levels and attenuate diabetes-mediated liver and kidney injury in db/db mice
Source: PubMed Central journal article supplement — BMJ Open Diabetes Res Care. 2020 Apr 23;8(1):e001028. doi: 10.1136/bmjdrc-2019-001028 (PMC7202753; doi:10.1136/bmjdrc-2019-001028), 2020-04-23
Supplement: bmjdrc-2019-001028supp001.pdf [file bmjdrc-2019-001028supp001.pdf]

## Supplemental Material

**A**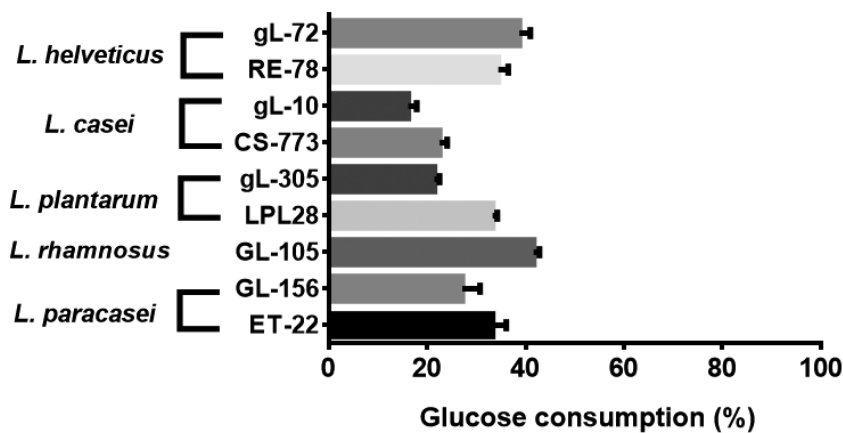**B**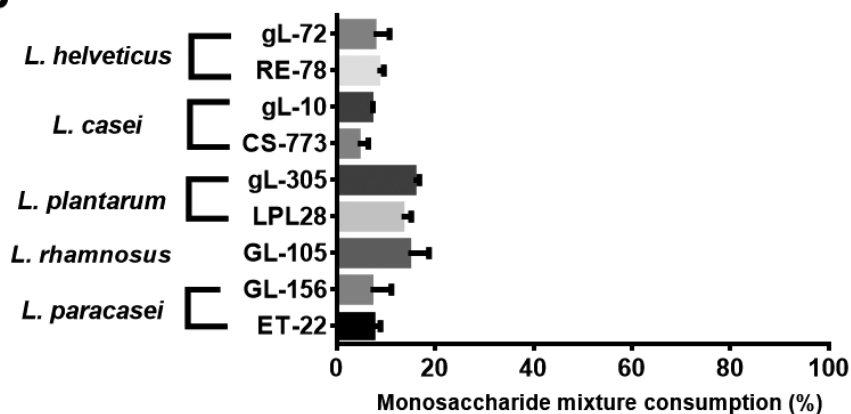

**Supplemental Figure 1. *Lactobacillus* strains with low monosaccharide consumption.** *Lactobacillus* species and strains ( $10^8$  CFU) were incubated with MRS medium containing (A) 2% glucose or (B) 6% monosaccharide. Monosaccharide concentrations in MRS medium were evaluated as described in Figure 1. Bar graphs represent means  $\pm$  SDs of the consumption rates from three individual experiments.

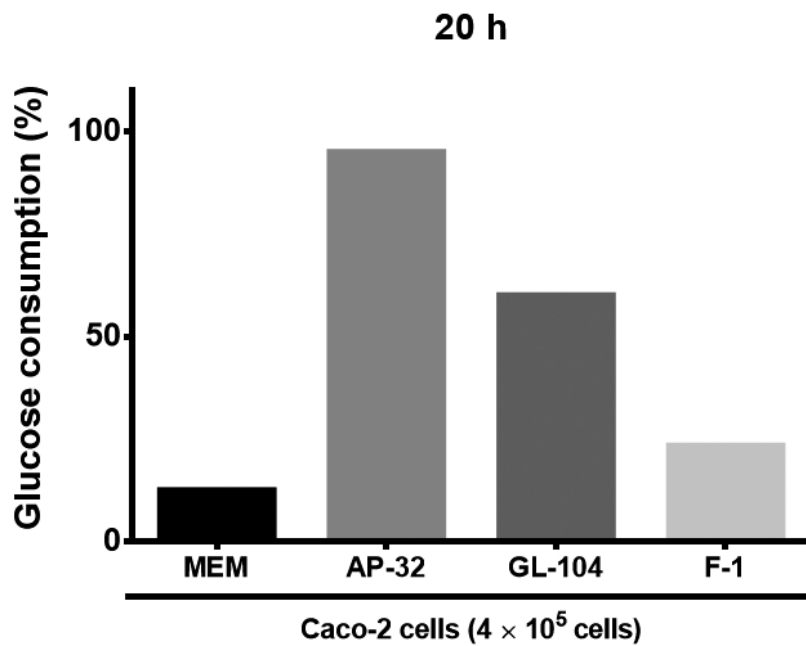

**Supplemental Figure 2. *L. salivarius* AP-32 and *L. reuteri* GL-104 consumed glucose effectively in the presence of epithelial intestinal cells.** Caco-2 cells were co-incubated with selected *Lactobacillus* strains as described in Figure 2. The bar graph shows the mean glucose consumption rates from two separate experiments. Minimum Essential Media (MEM) was used as the medium control.

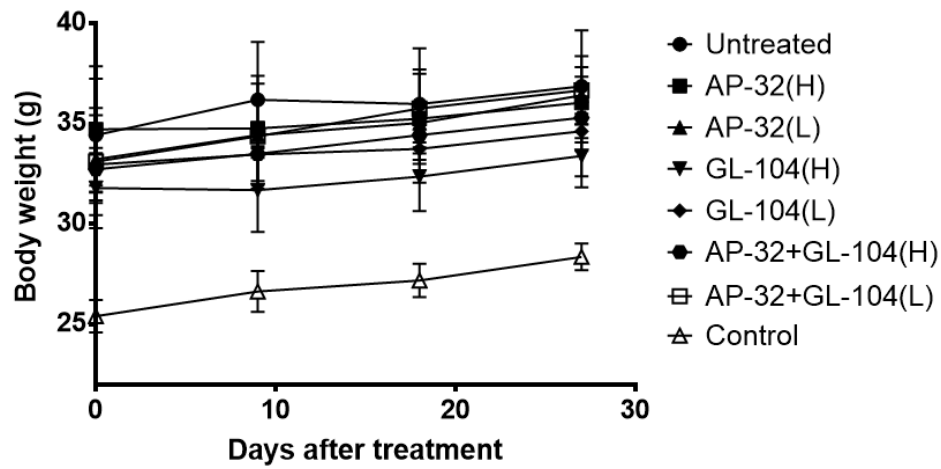

**Supplemental Figure 3. Changes in body weights of probiotic-treated db/db**

**mice.** Data represent means + SDs from three independent experiments. Nondiabetic

db/m mice served as a blank control, and untreated db/db mice served as the

experimental control.

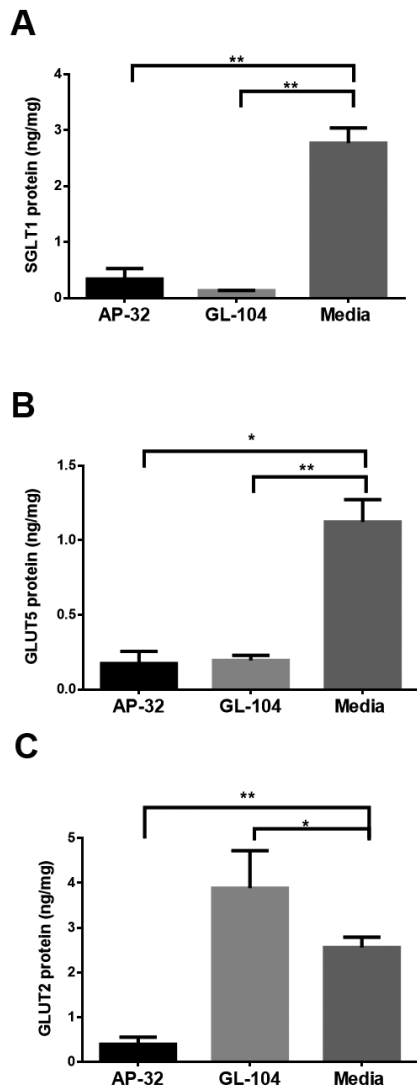

**Supplemental Figure 4. Expression of hexose transporter protein in the presence**

**of probiotics.** Caco-2 cells were treated with AP-32 and GL-104 as previously

described in Fig 2. Cells were lysed and proteins were extracted. Expression of

SGLT1, GLUT5, and GLUT2 proteins was analyzed using ELISA kits. Data were

normalized with the amount of total proteins and shown as means + SDs from two

independent experiments. Cells treated with MEM containing 0.45% glucose alone

served as a control  $**p < 0.01$ ;  $*p < 0.05$ .

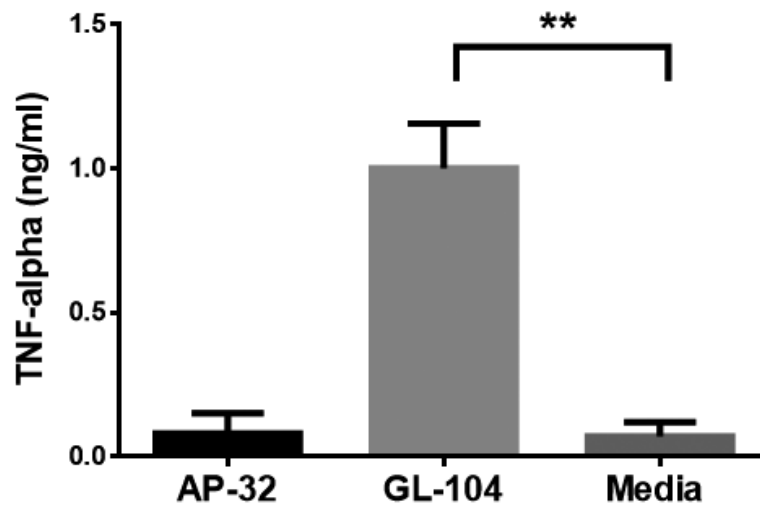

**Supplemental Figure 5. TNF- $\alpha$  production in Caco-2 cells after probiotic**

**treatment.** Caco-2 cells were treated with AP-32 and GL-104 as previously described in Fig 2. TNF- $\alpha$  in the cultural media was evaluated by ELISA. Data represent means + SDs from two independent experiments. Cells treated with MEM containing 0.45% glucose serve as a control.  $**p < 0.01$ .

**Supplemental Table 1. PCR primers**

---

|              |         |                                |
|--------------|---------|--------------------------------|
| <i>GLUT2</i> | Forward | CGT CTC CTT TGA CAT TTC CTT C  |
|              | Reverse | GGT GGA GAA AAC AGC CTA GAG AT |
| <i>GLUT5</i> | Forward | GCA ACA GGA TCA GAG CAT GA     |
|              | Reverse | TCG CAG GCA CGA TAG AAA AT     |
| <i>SGLT1</i> | Forward | CTC TTC ACC ATG GAC ATC TAC    |
|              | Reverse | TCG TTG ACA GGG TGC TAA TAG    |
| <i>GAPDH</i> | Forward | CCA TGG AGA AGG CTG GGG        |
|              | Reverse | CAA AGT TGT CAT GGA TGA CC     |

---

**Supplemental Table 2. Serum biochemistry analysis**

| <b>Treatments<sup>a</sup></b> | <b>AST<sup>b</sup></b> | <b>ALT<sup>b</sup></b> | <b>BUN<sup>c</sup></b> | <b>CREA<sup>c</sup></b> |
|-------------------------------|------------------------|------------------------|------------------------|-------------------------|
| <b>AP-32 (H)</b>              | 151.8 ± 57.9           | 89.5 ± 40.4**          | 27.4 ± 3.3***          | 0.2 ± 0.04              |
| <b>AP-32 (L)</b>              | 142.9 ± 75.3           | 107.4 ± 48.4*          | 30.7 ± 5.1*            | 0.26 ± 0.06             |
| <b>GL-104 (H)</b>             | 166.3 ± 80.6           | 105.6 ± 34.0*          | 29.5 ± 5.7**           | 0.23 ± 0.03             |
| <b>GL-104 (L)</b>             | 135.7 ± 42.8           | 99.5 ± 62.2*           | 28.2 ± 4.6**           | 0.26 ± 0.04             |
| <b>AP-32+GL-104 (H)</b>       | 144.9 ± 57.4           | 99.2 ± 17.4**          | 27.9 ± 1.9***          | 0.24 ± 0.04             |
| <b>AP-32+GL-104 (L)</b>       | 137.6 ± 92.7           | 109.1 ± 26.2**         | 27.7 ± 5.7**           | 0.26 ± 0.06             |
| <b>Untreated</b>              | 172.7 ± 66.1           | 169.1 ± 44.6           | 37.7 ± 3.8             | 0.27 ± 0.12             |
| <b>db/m</b>                   | 78.1 ± 14.9**          | 38.3 ± 18.8***         | 41.7 ± 12.4            | 0.31 ± 0.13             |

<sup>a</sup>Mice were treated with a (H) high ( $1.025 \times 10^9$  cfu/kg/day) or (L) low dose ( $5.125 \times 10^9$  CFU/kg/day) of probiotics.

<sup>b</sup>Activities of aspartate aminotransferase (AST) and alanine aminotransferase (ALT). Data are represented as means ± SD (U/L).

<sup>c</sup>Renal function assays: blood urea nitrogen (BUN) and creatinine (CREA) were evaluated. Data are represented mean ± SD (mg/dL).

\* $p < 0.05$ , \*\* $p < 0.01$ , \*\*\* $p < 0.005$ .
